# Supplementary material
Source: publisher site journal article supplement (https://www.dovepress.com/article/345921)
Supplement: Supplementary file 1 [file get_supplementary_file.php]

**Table S1** The significant differential expression genes

| Gene      | logFC    | AveExpr  | t        | P.Value  | adj.P.Val | B         |
|-----------|----------|----------|----------|----------|-----------|-----------|
| HPGDS     | 2.677748 | 4.790856 | 5.625018 | 0.000035 | 0.004643  | 2.490636  |
| MFAP5     | 2.381196 | 5.924773 | 5.369976 | 0.000059 | 0.005897  | 2.007313  |
| LYRM5     | 2.032682 | 7.376966 | 6.204112 | 0.000012 | 0.002505  | 3.553675  |
| COX20     | 2.008416 | 7.668762 | 4.340517 | 0.000486 | 0.018609  | -0.021266 |
| HLA-DRA   | 1.928792 | 5.836570 | 4.198595 | 0.000655 | 0.022184  | -0.308097 |
| ATP5E     | 1.884188 | 5.551442 | 5.106076 | 0.000100 | 0.007774  | 1.498242  |
| PARP2     | 1.857827 | 6.365432 | 4.582424 | 0.000293 | 0.014042  | 0.464633  |
| GOT2      | 1.843811 | 9.245905 | 5.788030 | 0.000026 | 0.003786  | 2.794823  |
| MYL4      | 1.816222 | 8.501809 | 3.798694 | 0.001530 | 0.037480  | -1.120119 |
| COQ3      | 1.737727 | 5.149012 | 5.900341 | 0.000021 | 0.003413  | 3.002178  |
| SGK1      | 1.714934 | 6.405154 | 4.403032 | 0.000426 | 0.017372  | 0.104703  |
| C14orf142 | 1.707482 | 6.211874 | 6.058280 | 0.000015 | 0.002864  | 3.290637  |
| MRPL46    | 1.680416 | 5.961148 | 8.650439 | 0.000000 | 0.000307  | 7.480638  |
| MRPS28    | 1.668528 | 6.551246 | 5.632393 | 0.000035 | 0.004623  | 2.504478  |
| RPL10     | 1.661995 | 7.597394 | 4.600818 | 0.000282 | 0.013740  | 0.501394  |
| FLRT3     | 1.647101 | 4.294763 | 5.474873 | 0.000048 | 0.005373  | 2.207168  |
| ATP5G1    | 1.644052 | 7.776777 | 5.974674 | 0.000018 | 0.003078  | 3.138400  |
| SMC2      | 1.643545 | 6.399002 | 6.275809 | 0.000010 | 0.002361  | 3.681818  |
| NDUFB9    | 1.631251 | 8.837357 | 5.522096 | 0.000043 | 0.005022  | 2.296657  |
| LMOD3     | 1.622092 | 7.847239 | 4.688019 | 0.000235 | 0.012310  | 0.675264  |
| C1QTNF9   | 1.612154 | 3.843738 | 6.004018 | 0.000017 | 0.002983  | 3.191950  |
| HLA-DQA1  | 1.601884 | 4.176391 | 4.335769 | 0.000490 | 0.018754  | -0.030844 |
| QRSL1     | 1.581726 | 5.828834 | 3.670424 | 0.002011 | 0.044189  | -1.380753 |
| PSMD14    | 1.578550 | 8.011629 | 4.039756 | 0.000917 | 0.026845  | -0.630195 |
| UQCRB     | 1.569417 | 6.917859 | 5.564665 | 0.000040 | 0.004864  | 2.377065  |
| RTN4IP1   | 1.549045 | 4.734914 | 7.573948 | 0.000001 | 0.000620  | 5.864782  |
| SLC5A1    | 1.492188 | 6.217799 | 5.078849 | 0.000105 | 0.007986  | 1.445233  |
| NIF3L1    | 1.460346 | 5.911282 | 5.122789 | 0.000096 | 0.007601  | 1.530737  |
| PROM1     | 1.444982 | 4.255511 | 4.091811 | 0.000821 | 0.025308  | -0.524538 |
| MUT       | 1.436042 | 6.550659 | 5.443516 | 0.000051 | 0.005416  | 2.147578  |
| ACADSB    | 1.409625 | 5.273498 | 4.606795 | 0.000278 | 0.013723  | 0.513332  |
| MAD2L1    | 1.408358 | 4.024802 | 3.682564 | 0.001960 | 0.043498  | -1.356101 |
| PTGDS     | 1.399239 | 5.742146 | 5.132445 | 0.000095 | 0.007521  | 1.549496  |
| ATP5H     | 1.381133 | 5.268352 | 6.616070 | 0.000005 | 0.001814  | 4.279219  |
| HLTF      | 1.371173 | 5.490217 | 4.075996 | 0.000849 | 0.025720  | -0.556629 |
| ARPC1A    | 1.370311 | 7.100535 | 3.867968 | 0.001320 | 0.034217  | -0.979284 |
| ATP5F1    | 1.363373 | 5.758161 | 4.287974 | 0.000542 | 0.020022  | -0.127330 |
| OMD       | 1.360539 | 4.375347 | 3.818890 | 0.001466 | 0.036456  | -1.079061 |
| TYRP1     | 1.358361 | 3.952591 | 4.774826 | 0.000196 | 0.011082  | 0.847652  |
| RFC3      | 1.357257 | 4.905158 | 4.854078 | 0.000167 | 0.010321  | 1.004384  |
| CUEDC2    | 1.355341 | 5.854903 | 4.074809 | 0.000851 | 0.025740  | -0.559038 |
| FASTKD5   | 1.346145 | 5.876644 | 6.585279 | 0.000006 | 0.001878  | 4.225894  |
| CD74      | 1.342100 | 5.455293 | 3.591714 | 0.002378 | 0.047930  | -1.540476 |
| IFI44     | 1.328048 | 4.520152 | 9.900808 | 0.000000 | 0.000116  | 9.152546  |

|           |          |           |           |          |          |           |
|-----------|----------|-----------|-----------|----------|----------|-----------|
| FAM192A   | 1.318999 | 5.693580  | 7.114072  | 0.000002 | 0.001014 | 5.121274  |
| BEX1      | 1.318991 | 7.000179  | 4.759394  | 0.000203 | 0.011232 | 0.817059  |
| FAM180A   | 1.311112 | 3.606755  | 4.102351  | 0.000803 | 0.024971 | -0.503154 |
| COPS4     | 1.308775 | 6.373837  | 4.094837  | 0.000816 | 0.025226 | -0.518398 |
| MTHFS     | 1.306153 | 5.384898  | 3.988986  | 0.001021 | 0.028885 | -0.733314 |
| NDUFAF1   | 1.305672 | 6.500856  | 7.246738  | 0.000002 | 0.000872 | 5.339107  |
| CHCHD6    | 1.304917 | 4.761364  | 5.018779  | 0.000119 | 0.008406 | 1.327972  |
| FH        | 1.298388 | 7.289064  | 5.290869  | 0.000069 | 0.006464 | 1.855637  |
| MRPL1     | 1.297937 | 7.008995  | 4.061362  | 0.000876 | 0.026258 | -0.586331 |
| CENPJ     | 1.297818 | 4.481759  | 4.039776  | 0.000917 | 0.026845 | -0.630155 |
| NTN4      | 1.297215 | 7.396090  | 4.983293  | 0.000128 | 0.008813 | 1.258507  |
| FARS2     | 1.295123 | 4.116582  | 5.353868  | 0.000061 | 0.005994 | 1.976495  |
| SDHD      | 1.288941 | 6.354213  | 6.033886  | 0.000016 | 0.002920 | 3.246327  |
| NDUFB6    | 1.287864 | 8.222016  | 5.801221  | 0.000025 | 0.003786 | 2.819272  |
| BVES      | 1.280762 | 10.496081 | 5.027764  | 0.000117 | 0.008328 | 1.345538  |
| TAS2R13   | 1.276624 | 4.799077  | 3.847460  | 0.001379 | 0.035232 | -1.020978 |
| NNT       | 1.274922 | 6.862033  | 4.499545  | 0.000348 | 0.015698 | 0.298651  |
| LACTB2    | 1.259370 | 5.851759  | 6.346356  | 0.000009 | 0.002311 | 3.807140  |
| UNC119B   | 1.256489 | 5.307499  | 3.712692  | 0.001838 | 0.042183 | -1.294904 |
| LLPH      | 1.234317 | 5.456785  | 3.829323  | 0.001434 | 0.036021 | -1.057852 |
| AIMP2     | 1.233825 | 7.828371  | 4.368132  | 0.000458 | 0.018033 | 0.034409  |
| SPHAR     | 1.231217 | 4.411457  | 4.033028  | 0.000930 | 0.027095 | -0.643856 |
| UQCR10    | 1.229302 | 7.121525  | 6.018955  | 0.000017 | 0.002974 | 3.219161  |
| MAOB      | 1.215981 | 5.622331  | 4.475775  | 0.000366 | 0.015969 | 0.250947  |
| DNAJC19   | 1.210162 | 8.044666  | 5.178453  | 0.000086 | 0.007145 | 1.638724  |
| LYVE1     | 1.204873 | 4.951860  | 4.322293  | 0.000505 | 0.019252 | -0.058036 |
| P2RY14    | 1.195675 | 4.311251  | 6.309477  | 0.000010 | 0.002311 | 3.741722  |
| TMEM186   | 1.195656 | 6.612269  | 8.620675  | 0.000000 | 0.000307 | 7.438234  |
| PMPCB     | 1.189303 | 8.430798  | 4.889259  | 0.000155 | 0.009916 | 1.073753  |
| LRRC39    | 1.188873 | 8.707418  | 3.909062  | 0.001210 | 0.032026 | -0.895742 |
| SMIM7     | 1.188710 | 6.422835  | 3.946347  | 0.001118 | 0.030665 | -0.819957 |
| NDUFA9    | 1.186410 | 8.689365  | 7.217690  | 0.000002 | 0.000892 | 5.291644  |
| ZFP3      | 1.185603 | 5.361865  | 8.335814  | 0.000000 | 0.000329 | 7.025984  |
| MYL9      | 1.184998 | 9.115691  | 4.748799  | 0.000207 | 0.011283 | 0.796042  |
| ATP5L     | 1.175904 | 10.634881 | 12.583832 | 0.000000 | 0.000014 | 12.106851 |
| DBT       | 1.174618 | 5.806823  | 3.835779  | 0.001414 | 0.035666 | -1.044727 |
| NIPSNAP3A | 1.169286 | 6.138197  | 3.659285  | 0.002059 | 0.044760 | -1.403370 |
| ATP1A3    | 1.168058 | 5.346147  | 3.706723  | 0.001861 | 0.042348 | -1.307030 |
| CAT       | 1.164290 | 8.224103  | 3.650965  | 0.002096 | 0.044898 | -1.420260 |
| MPC1      | 1.160930 | 8.245135  | 6.711351  | 0.000005 | 0.001585 | 4.443305  |
| ARHGEF6   | 1.158282 | 5.931511  | 4.155470  | 0.000717 | 0.023224 | -0.395452 |
| RRP15     | 1.147646 | 7.210649  | 4.284572  | 0.000546 | 0.020068 | -0.134203 |
| TMEM126A  | 1.144666 | 7.034920  | 4.094322  | 0.000817 | 0.025226 | -0.519442 |
| RGS2      | 1.142820 | 5.516135  | 4.588613  | 0.000289 | 0.013900 | 0.477004  |
| FAM129A   | 1.125040 | 7.718750  | 6.346401  | 0.000009 | 0.002311 | 3.807218  |
| CASP5     | 1.120229 | 4.108845  | 3.837359  | 0.001409 | 0.035614 | -1.041515 |

|          |           |           |           |          |          |           |
|----------|-----------|-----------|-----------|----------|----------|-----------|
| ASB14    | 1.117238  | 6.099152  | 3.650360  | 0.002099 | 0.044898 | -1.421489 |
| LSM5     | 1.115078  | 4.674041  | 5.103493  | 0.000100 | 0.007774 | 1.493218  |
| GTF2B    | 1.108377  | 7.511791  | 5.052095  | 0.000111 | 0.008167 | 1.393059  |
| CPEB4    | 1.106012  | 6.530838  | 5.049224  | 0.000112 | 0.008167 | 1.387456  |
| COQ7     | 1.096378  | 4.668385  | 9.151877  | 0.000000 | 0.000231 | 8.176392  |
| CFAP20   | 1.093035  | 5.565304  | 4.142951  | 0.000737 | 0.023575 | -0.420826 |
| NUBP1    | 1.090778  | 6.608977  | 5.323816  | 0.000064 | 0.006218 | 1.918907  |
| LANCL2   | 1.090640  | 4.307002  | 10.052309 | 0.000000 | 0.000116 | 9.341245  |
| PFDN4    | 1.087275  | 6.105001  | 5.297536  | 0.000068 | 0.006412 | 1.868450  |
| PCCB     | 1.083386  | 5.518053  | 5.156636  | 0.000090 | 0.007341 | 1.596445  |
| IFT27    | 1.081913  | 5.181431  | 6.426610  | 0.000008 | 0.002157 | 3.948777  |
| TIMMDC1  | 1.079452  | 6.827907  | 6.576555  | 0.000006 | 0.001878 | 4.210758  |
| C17orf75 | 1.077686  | 6.117862  | 6.139728  | 0.000013 | 0.002646 | 3.437941  |
| MFS1     | 1.076358  | 6.385398  | 5.384242  | 0.000057 | 0.005833 | 2.034578  |
| PIGU     | 1.074895  | 4.969703  | 6.716024  | 0.000004 | 0.001585 | 4.451316  |
| TIMM23   | 1.063063  | 9.232238  | 5.811074  | 0.000025 | 0.003786 | 2.837518  |
| PFDN1    | 1.062750  | 5.678623  | 4.783352  | 0.000193 | 0.011006 | 0.864543  |
| SRSF3    | 1.061241  | 9.169040  | 3.599723  | 0.002338 | 0.047446 | -1.524234 |
| ACADM    | 1.058305  | 9.138126  | 4.219671  | 0.000626 | 0.021527 | -0.265434 |
| EDNRA    | 1.056848  | 7.262013  | 4.468592  | 0.000371 | 0.016130 | 0.236523  |
| PSMB6    | 1.052868  | 5.442067  | 3.722710  | 0.001799 | 0.041510 | -1.274549 |
| NES      | 1.051917  | 5.236303  | 5.003393  | 0.000123 | 0.008568 | 1.297871  |
| ZHX3     | 1.050184  | 4.206847  | 4.459059  | 0.000379 | 0.016304 | 0.217374  |
| TMEM19   | 1.049890  | 4.775593  | 6.801485  | 0.000004 | 0.001565 | 4.597229  |
| SGO1     | 1.047756  | 4.693202  | 3.585097  | 0.002412 | 0.048387 | -1.553892 |
| POLR2G   | 1.046961  | 7.705439  | 4.238403  | 0.000602 | 0.021099 | -0.227535 |
| IFI44L   | 1.038791  | 4.006170  | 5.791099  | 0.000026 | 0.003786 | 2.800513  |
| COQ2     | 1.037328  | 5.322312  | 4.524791  | 0.000330 | 0.015210 | 0.349269  |
| MRPS10   | 1.036631  | 7.553938  | 8.001568  | 0.000000 | 0.000469 | 6.527200  |
| GYG1     | 1.036417  | 6.333750  | 3.655423  | 0.002076 | 0.044837 | -1.411211 |
| FOPNL    | 1.034908  | 6.842132  | 4.478105  | 0.000364 | 0.015931 | 0.255625  |
| MEGF8    | 1.031130  | 5.213975  | 6.484062  | 0.000007 | 0.002038 | 4.049567  |
| EMG1     | 1.026890  | 6.642860  | 4.479393  | 0.000363 | 0.015928 | 0.258210  |
| ARL2BP   | 1.024403  | 6.970180  | 6.410633  | 0.000008 | 0.002187 | 3.920659  |
| PDHB     | 1.023892  | 8.935983  | 4.990941  | 0.000126 | 0.008721 | 1.273491  |
| DARS2    | 1.019921  | 5.109127  | 8.433600  | 0.000000 | 0.000324 | 7.168817  |
| TRMT61B  | 1.014585  | 4.866729  | 4.871323  | 0.000161 | 0.010177 | 1.038403  |
| SAMM50   | 1.012643  | 7.210393  | 4.753174  | 0.000205 | 0.011238 | 0.804722  |
| SLC46A3  | 1.010986  | 4.558174  | 6.968905  | 0.000003 | 0.001246 | 4.879792  |
| RBX1     | 1.009276  | 7.595503  | 4.417500  | 0.000413 | 0.017006 | 0.133819  |
| EMC4     | 1.008972  | 7.783375  | 4.492826  | 0.000353 | 0.015763 | 0.285172  |
| UQCRQ    | 1.008747  | 11.591109 | 4.406417  | 0.000423 | 0.017301 | 0.111516  |
| NSDHL    | 1.006678  | 6.296395  | 4.235350  | 0.000606 | 0.021099 | -0.233712 |
| NDUFA8   | 1.002359  | 9.848424  | 8.238617  | 0.000000 | 0.000360 | 6.882633  |
| PRH2     | 1.001248  | 3.345871  | 5.968920  | 0.000018 | 0.003082 | 3.127885  |
| KAT6A    | -1.002650 | 6.848948  | -4.351532 | 0.000474 | 0.018421 | 0.000946  |

|              |           |           |           |          |          |           |
|--------------|-----------|-----------|-----------|----------|----------|-----------|
| AHNAK2       | -1.009540 | 3.816516  | -3.633960 | 0.002174 | 0.045478 | -1.454776 |
| PPME1        | -1.011376 | 6.520190  | -6.278926 | 0.000010 | 0.002361 | 3.687370  |
| SPTA1        | -1.013347 | 3.753013  | -5.270091 | 0.000072 | 0.006587 | 1.815664  |
| NUMA1        | -1.019859 | 4.615112  | -4.280307 | 0.000551 | 0.020164 | -0.142820 |
| DIAPH1       | -1.032252 | 5.564931  | -4.122883 | 0.000769 | 0.024297 | -0.461512 |
| ENO1         | -1.034426 | 8.847521  | -5.046255 | 0.000113 | 0.008167 | 1.381659  |
| IL1R1        | -1.036762 | 6.045140  | -3.705819 | 0.001865 | 0.042348 | -1.308865 |
| SLC2A1       | -1.040442 | 5.487909  | -4.057613 | 0.000883 | 0.026287 | -0.593941 |
| NT5C3A       | -1.045280 | 4.860184  | -4.913587 | 0.000148 | 0.009609 | 1.121644  |
| AKAP12       | -1.059526 | 5.620019  | -4.748238 | 0.000207 | 0.011283 | 0.794928  |
| STBD1        | -1.066850 | 7.268392  | -4.901799 | 0.000151 | 0.009700 | 1.098446  |
| HIST1H2BD    | -1.075932 | 5.959913  | -4.022117 | 0.000952 | 0.027546 | -0.666014 |
| PLIN2        | -1.077456 | 6.812955  | -4.116174 | 0.000780 | 0.024433 | -0.475117 |
| HMBOX1       | -1.080320 | 6.963896  | -5.891611 | 0.000021 | 0.003413 | 2.986127  |
| BTG1         | -1.082195 | 7.643113  | -5.578947 | 0.000039 | 0.004864 | 2.403987  |
| TYW1B        | -1.097239 | 3.895973  | -4.735022 | 0.000213 | 0.011418 | 0.768697  |
| WBP2         | -1.103188 | 6.751452  | -4.659528 | 0.000249 | 0.012766 | 0.618532  |
| UGCG         | -1.113906 | 5.077239  | -4.515213 | 0.000337 | 0.015333 | 0.330071  |
| DDX23        | -1.121272 | 5.967838  | -5.392283 | 0.000056 | 0.005833 | 2.049935  |
| PPP1R3C      | -1.123835 | 9.828219  | -3.668501 | 0.002019 | 0.044205 | -1.384658 |
| EPB41L4A-AS1 | -1.132376 | 5.712858  | -5.375597 | 0.000058 | 0.005897 | 2.018059  |
| SAT1         | -1.147531 | 9.058448  | -5.144621 | 0.000092 | 0.007397 | 1.573137  |
| CLCNKB       | -1.149298 | 4.880053  | -4.671674 | 0.000243 | 0.012559 | 0.642725  |
| BACE2        | -1.176687 | 6.791200  | -4.743611 | 0.000209 | 0.011286 | 0.785747  |
| ABCA1        | -1.189308 | 5.038776  | -3.845100 | 0.001386 | 0.035287 | -1.025776 |
| GPR137B      | -1.200804 | 5.540862  | -6.387108 | 0.000008 | 0.002249 | 3.879184  |
| CCNL1        | -1.220895 | 7.625062  | -4.792340 | 0.000189 | 0.010943 | 0.882343  |
| TAGLN2       | -1.228433 | 9.052772  | -6.326164 | 0.000009 | 0.002311 | 3.771347  |
| PAXBP1       | -1.268549 | 7.092126  | -4.380014 | 0.000447 | 0.017869 | 0.058350  |
| VCAN         | -1.269555 | 7.525454  | -3.747032 | 0.001708 | 0.039968 | -1.225127 |
| CGNL1        | -1.273384 | 7.954047  | -3.581480 | 0.002431 | 0.048484 | -1.561226 |
| GPATCH11     | -1.274960 | 9.554469  | -7.660088 | 0.000001 | 0.000613 | 6.000443  |
| RPGR         | -1.293404 | 6.367467  | -4.012378 | 0.000971 | 0.027983 | -0.685795 |
| NPPB         | -1.298719 | 11.256204 | -3.698891 | 0.001893 | 0.042482 | -1.322940 |
| VSTM1        | -1.299946 | 5.816953  | -7.473880 | 0.000001 | 0.000665 | 5.705763  |
| COL6A3       | -1.328048 | 6.037887  | -5.445584 | 0.000050 | 0.005416 | 2.151513  |
| CLEC2B       | -1.332576 | 5.025030  | -4.164383 | 0.000704 | 0.022960 | -0.377390 |
| BNIP3L       | -1.346933 | 8.492434  | -8.693490 | 0.000000 | 0.000307 | 7.541749  |
| IFITM2       | -1.365325 | 5.464238  | -4.941223 | 0.000139 | 0.009252 | 1.175970  |
| LNX2         | -1.370027 | 6.898098  | -7.375426 | 0.000001 | 0.000736 | 5.547812  |
| PRELID2      | -1.384414 | 4.894400  | -5.811176 | 0.000025 | 0.003786 | 2.837707  |
| IFRD1        | -1.398911 | 6.545795  | -5.622524 | 0.000036 | 0.004643 | 2.485953  |
| HIST1H2BF    | -1.405254 | 9.217689  | -7.645900 | 0.000001 | 0.000613 | 5.978175  |
| PLOD2        | -1.407978 | 7.712116  | -8.956030 | 0.000000 | 0.000266 | 7.908796  |
| P4HA1        | -1.412545 | 6.799461  | -5.433920 | 0.000052 | 0.005475 | 2.129317  |
| IGF2BP2      | -1.420079 | 7.051902  | -7.153070 | 0.000002 | 0.000972 | 5.185590  |

|           |           |           |           |          |          |           |
|-----------|-----------|-----------|-----------|----------|----------|-----------|
| C1R       | -1.432827 | 5.689642  | -4.930634 | 0.000143 | 0.009384 | 1.155164  |
| PYGL      | -1.449884 | 6.023807  | -4.130489 | 0.000756 | 0.024040 | -0.446089 |
| RRAD      | -1.452749 | 4.987175  | -4.442436 | 0.000392 | 0.016701 | 0.183969  |
| HIST1H1E  | -1.456627 | 5.810317  | -3.653644 | 0.002084 | 0.044837 | -1.414823 |
| TFPI      | -1.535236 | 6.760053  | -5.551710 | 0.000041 | 0.004864 | 2.352621  |
| YBX3      | -1.537650 | 10.752721 | -6.434799 | 0.000008 | 0.002157 | 3.963174  |
| AHSP      | -1.565406 | 3.954086  | -3.771062 | 0.001623 | 0.038794 | -1.176288 |
| SLC5A3    | -1.576468 | 6.754824  | -4.233214 | 0.000609 | 0.021153 | -0.238032 |
| GYPA      | -1.643763 | 4.062691  | -4.980822 | 0.000129 | 0.008813 | 1.253664  |
| OSMR      | -1.649112 | 6.861196  | -4.053805 | 0.000890 | 0.026455 | -0.601671 |
| ERO1A     | -1.688878 | 7.269990  | -4.653925 | 0.000252 | 0.012840 | 0.607366  |
| SCD       | -1.696483 | 6.200301  | -3.773143 | 0.001616 | 0.038794 | -1.172058 |
| VEGFA     | -1.715984 | 7.794676  | -5.187226 | 0.000085 | 0.007087 | 1.655708  |
| EFEMP1    | -1.732916 | 5.390458  | -5.155804 | 0.000090 | 0.007341 | 1.594831  |
| CLIC1     | -1.766934 | 7.893369  | -6.314478 | 0.000009 | 0.002311 | 3.750605  |
| ARRDC3    | -1.842902 | 7.749936  | -5.192140 | 0.000084 | 0.007051 | 1.665217  |
| TMEM2     | -1.846420 | 7.014950  | -6.766475 | 0.000004 | 0.001585 | 4.537592  |
| BHLHE40   | -2.019127 | 7.004505  | -6.437435 | 0.000007 | 0.002157 | 3.967806  |
| COL11A1   | -2.127842 | 5.300933  | -3.828137 | 0.001437 | 0.036060 | -1.060262 |
| HSD17B7P2 | -2.202311 | 4.603942  | -3.967655 | 0.001068 | 0.029790 | -0.776656 |
| PII5      | -2.202862 | 4.610903  | -5.089283 | 0.000103 | 0.007887 | 1.465559  |
| SLC2A3    | -2.220953 | 8.186182  | -5.217994 | 0.000080 | 0.006857 | 1.715201  |
| ADAMTS9   | -2.243452 | 6.545846  | -3.629854 | 0.002193 | 0.045659 | -1.463108 |
| HBB       | -2.277376 | 9.869763  | -5.751512 | 0.000028 | 0.004008 | 2.727009  |
| NAMPT     | -2.352978 | 10.026246 | -5.907698 | 0.000020 | 0.003401 | 3.015697  |
| GYPB      | -2.454293 | 4.283995  | -4.963494 | 0.000133 | 0.009011 | 1.219688  |
| IL1RL1    | -2.487512 | 5.586999  | -4.179642 | 0.000682 | 0.022628 | -0.346478 |
| PLA2G2A   | -3.915489 | 7.761885  | -5.071264 | 0.000107 | 0.008040 | 1.430449  |
